# Supplementary material for: Salinity-Conveyed Thermotolerance in the Coral Model Aiptasia Is Accompanied by Distinct Changes of the Bacterial Microbiome
Source: Frontiers journal article supplement (doi:10.3389/fmars.2020.573635), 2020-11-25
Supplement: Data_Sheet_3.pdf [file Data_Sheet_3.pdf]

## Supplementary Information

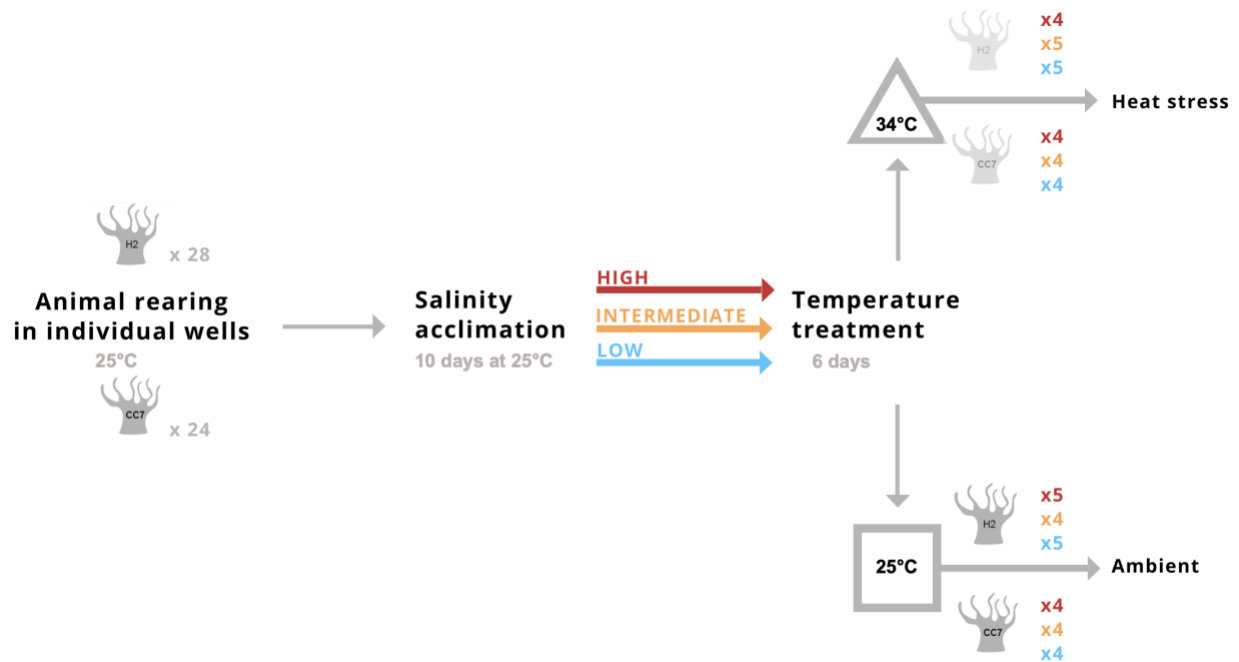

**Supplementary Figure 1.** Overview of the experimental setup. Two Aiptasia host-algal symbiont pairings (H2-SSB01 and CC7-SSA01) were acclimated for 10 days at low (36 PSU), intermediate (39 PSU), and high (42 PSU) salinities at ambient temperature (25°C), before subjected to a 6-day long heat stress experiment (34°C). A control for each salinity was kept at ambient temperature throughout the experiment. Total number of animals and respective number of replicates at each salinity are indicated.

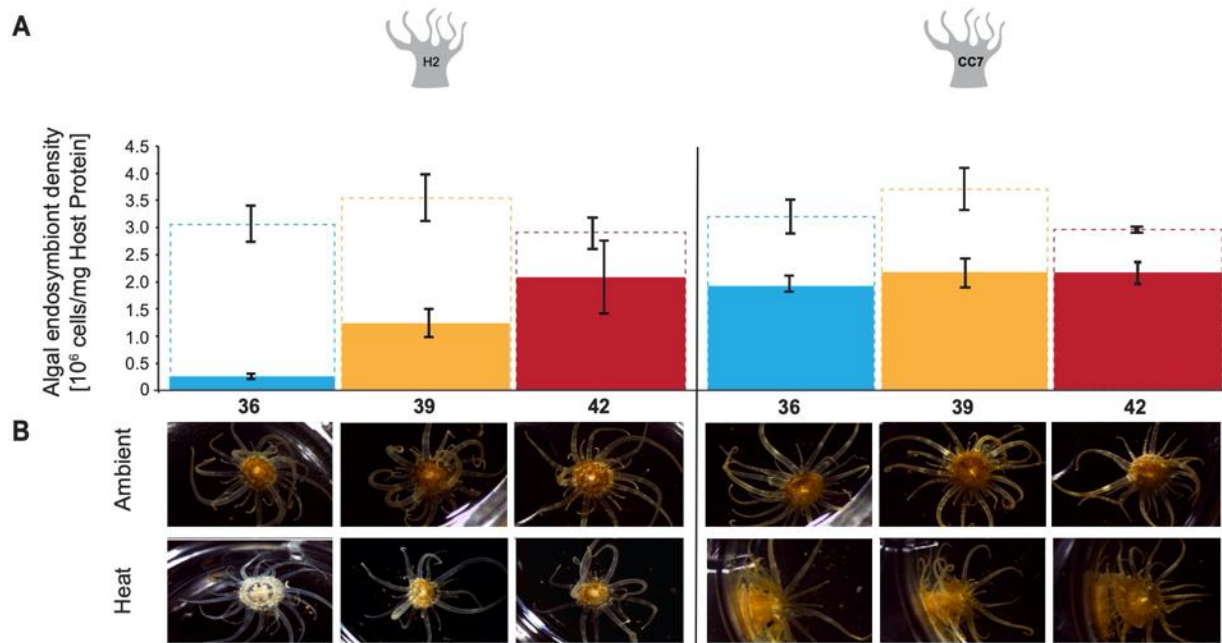

**Supplementary Figure 2.** Effect of low (36 PSU), intermediate (39 PSU), and high (42 PSU) salinity on (A) host-algal symbiont density and (B) host phenotype, as shown by photographic documentation for ambient (25 °C) and heat stressed (34 °C) Aiptasia host-algal symbiont pairings H2-SSB01 and CC7-SSA01 (adapted from Gegner *et al.*, 2019 who additionally assessed photosynthetic efficiency). (A) Dashed lines depict animals at ambient temperature (25 °C); solid lines depict animals under heat stress (34 °C). Error bars show the standard error of the mean (SE). (B) Pictures of representative symbiotic and aposymbiotic anemones at ambient and at heat stress temperatures across different salinities after 6 days of the experiment.

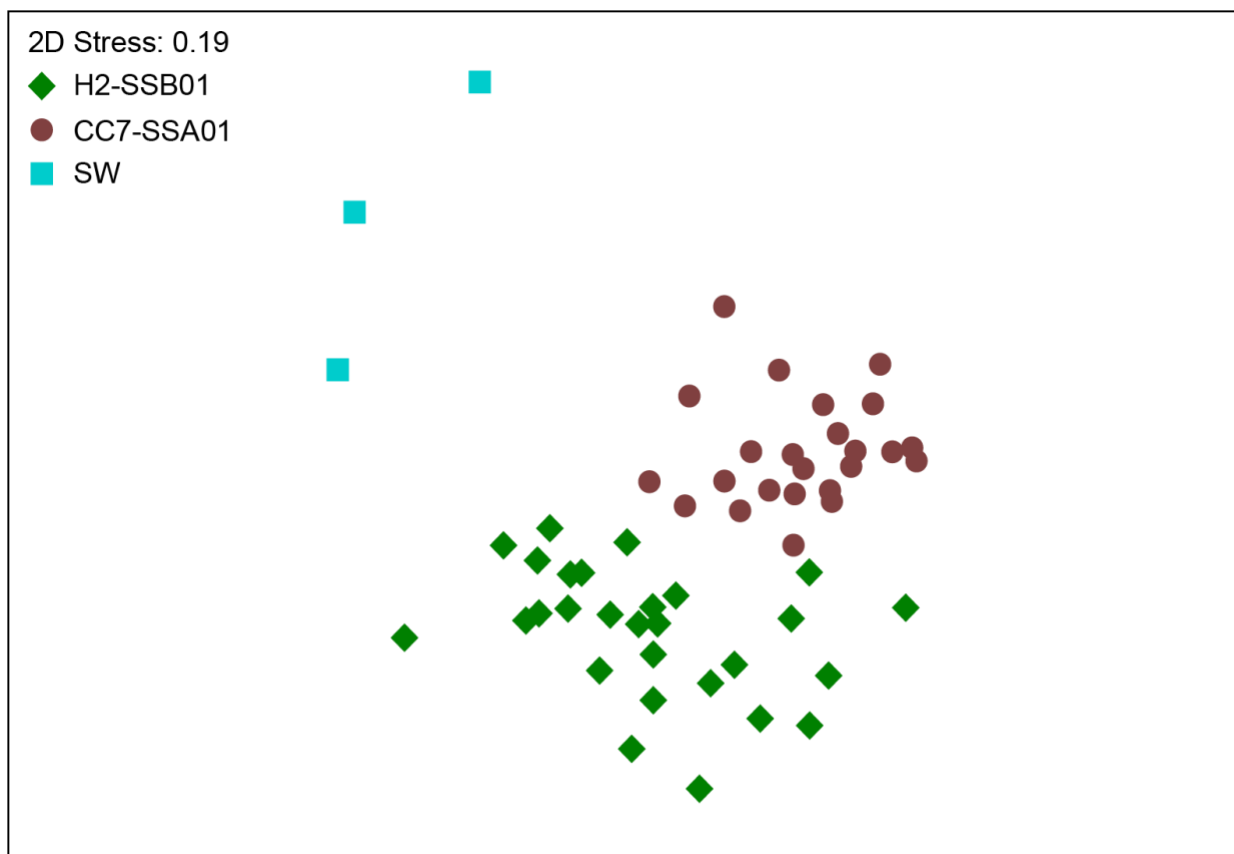

**Supplementary Figure 3.** Non-metric multidimensional scaling (nMDS) of bacterial communities from H2-SSB01 (diamond), CC7-SSA01 (circle), and seawater (square). Each symbol represents one sample. The plot is based on based on Bray-Curtis dissimilarities of relative OTU abundances.

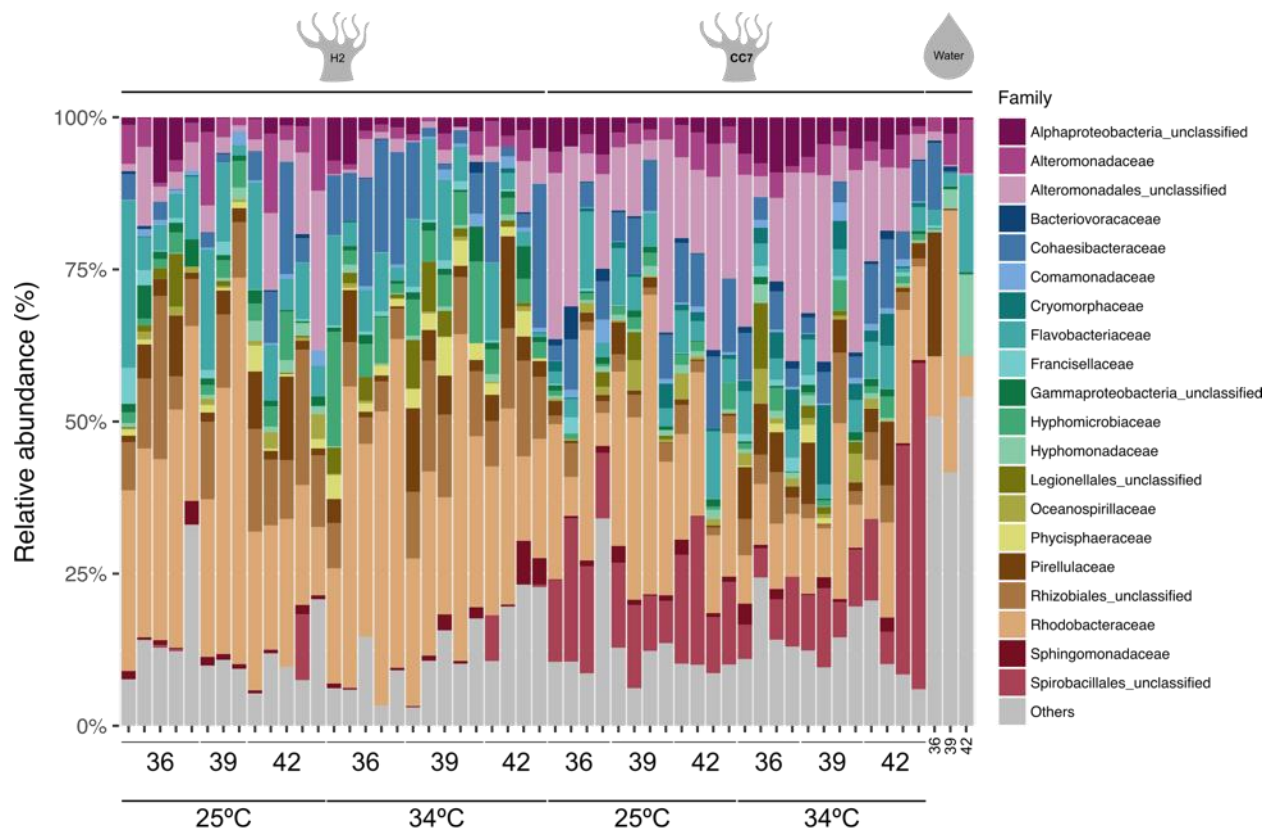

**Supplementary Figure 4.** Taxonomy bar chart of bacterial families (Greengenes database, bootstrap  $\geq 60$ ) of Aiptasia host-algal symbiont pairings H2-SSB01, CC7-SSA01, and seawater samples across temperatures and salinities. Each bar denotes the percentage of 16S rRNA gene sequences across samples. Each color represents one of the twenty most abundant families across samples. The ‘Others’ category groups the less abundant families.

**Supplementary Table 1.** Average alpha diversity indices (Chao1 denoted as mean  $\pm$  SE, Inverse Simpson and Simpson's Evenness as mean  $\pm$  SD) of bacterial communities associated with H2-SSB01 and CC7-SSA01 across temperature and salinity treatments.

| Host-algal symbiont | Temp | Salinity | No. of OTUs | Chao1                   | Inverse Simpson      | Simpson's evenness      | n |
|---------------------|------|----------|-------------|-------------------------|----------------------|-------------------------|---|
| H2-SSB01            | 25   | 36       | 521         | 1174.58 ( $\pm$ 104.48) | 13.32 ( $\pm$ 6.6)   | 0.00057 ( $\pm$ 0.0003) | 5 |
| H2-SSB01            | 25   | 39       | 404         | 738.82 ( $\pm$ 61.07)   | 10.09 ( $\pm$ 4.95)  | 0.00078 ( $\pm$ 0.0005) | 4 |
| H2-SSB01            | 25   | 42       | 516         | 1014 ( $\pm$ 79.45)     | 10.77 ( $\pm$ 4.9)   | 0.00068 ( $\pm$ 0.0003) | 5 |
| H2-SSB01            | 34   | 36       | 508         | 1198.61 ( $\pm$ 117.14) | 17.14 ( $\pm$ 6.64)  | 0.00036 ( $\pm$ 0.0001) | 5 |
| H2-SSB01            | 34   | 39       | 506         | 1042.81 ( $\pm$ 90.37)  | 11.69 ( $\pm$ 4.44)  | 0.00054 ( $\pm$ 0.0003) | 5 |
| H2-SSB01            | 34   | 42       | 488         | 1016.15 ( $\pm$ 83.87)  | 12.32 ( $\pm$ 5.45)  | 0.00042 ( $\pm$ 0.0001) | 4 |
| CC7-SSA01           | 25   | 36       | 593         | 1143.92 ( $\pm$ 81.35)  | 13.98 ( $\pm$ 4.38)  | 0.00034 ( $\pm$ 0.0001) | 4 |
| CC7-SSA01           | 25   | 39       | 535         | 876 ( $\pm$ 54.34)      | 12.22 ( $\pm$ 7.19)  | 0.00059 ( $\pm$ 0.0004) | 4 |
| CC7-SSA01           | 25   | 42       | 526         | 930.25 ( $\pm$ 66.2)    | 15.93 ( $\pm$ 10.36) | 0.00035 ( $\pm$ 0.0002) | 4 |
| CC7-SSA01           | 34   | 36       | 577         | 1288.4 ( $\pm$ 110.1)   | 9.57 ( $\pm$ 2.66)   | 0.00054 ( $\pm$ 0.0001) | 4 |
| CC7-SSA01           | 34   | 39       | 515         | 1181.18 ( $\pm$ 111.51) | 17.29 ( $\pm$ 5.1)   | 0.00029 ( $\pm$ 0.0001) | 4 |
| CC7-SSA01           | 34   | 42       | 413         | 803.62 ( $\pm$ 73.31)   | 14.32 ( $\pm$ 3.16)  | 0.0004 ( $\pm$ 0.00007) | 4 |
| seawater            | 25   | 36       | 165         | 165                     | 12.24                | 0.0005                  | 1 |
| seawater            | 25   | 39       | 282         | 282                     | 10.93                | 0.00032                 | 1 |
| seawater            | 25   | 42       | 200         | 200                     | 11.38                | 0.00044                 | 1 |

**Supplementary Table 2.** Summary statistics of pairwise PERMANOVAs. Analysis based on Bray-Curtis dissimilarities of relative bacterial OTU abundances.

| <b>Host-algal symbiont pairing</b> | <b><i>t</i> statistic</b> | <b><i>P</i> (perm)</b> | <b>Permutations</b> |
|------------------------------------|---------------------------|------------------------|---------------------|
| H2-SSB01; 36, 39                   | 1.1282                    | 0.19                   | 999                 |
| H2-SSB01; 36, 42                   | 2.1243                    | 0.001                  | 999                 |
| H2-SSB01; 39, 42                   | 2.172                     | 0.001                  | 997                 |
| CC7-SSA01; 36, 39                  | 1.0623                    | 0.303                  | 999                 |
| CC7-SSA01; 36, 42                  | 1.6938                    | 0.002                  | 999                 |
| CC7-SSA01; 39, 42                  | 1.7328                    | 0.002                  | 998                 |

**Supplementary Data S1.** Bacterial OTU abundance counts, taxonomic annotation, and representative OTU sequences from Aiptasia host-algal symbiont pairings (H2-SSB01 and CC7-SSA01) and seawater samples across all temperatures and salinities.

**Supplementary Data S2.** Bacterial OTUs that contributed up to 50% of the cumulative differences in pairwise comparisons between salinities of H2-SSB01 and CC7-SSA01 under ambient temperature and heat stress.
